# Supplementary material for: Short-term fate of intertidal microphytobenthos carbon under enhanced nutrient availability: A 13 C pulse-chase experiment
Source: Copernicus journal article supplement (doi:10.5194/bg-2017-448), 2017-11-02
Supplement: Supplementary file 1 [file bg-2017-448-supplement.pdf]

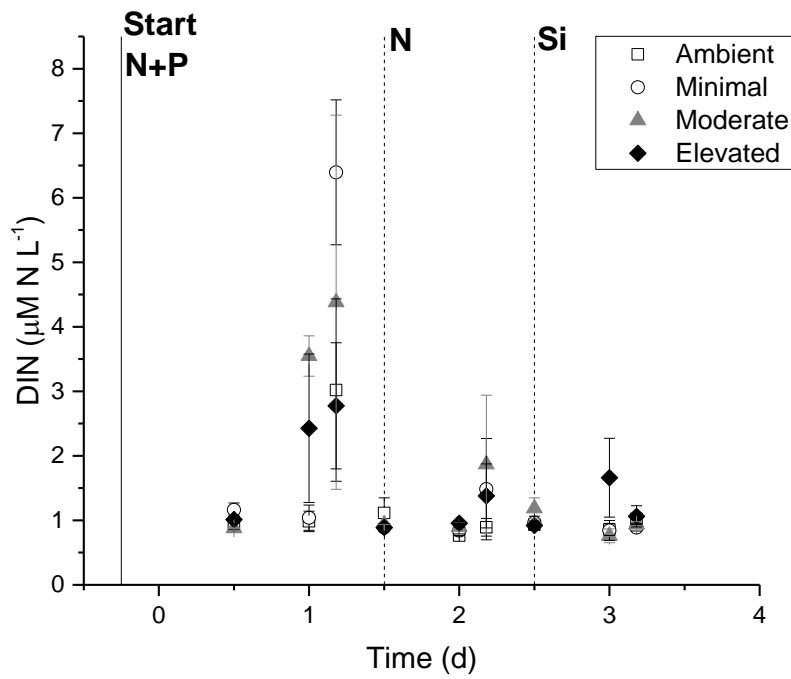

1

2 **Supplemental Figure 1:** Dissolved inorganic nitrogen in the overlying core waters during  
 3 sampling for light and dark incubations. The solid line is when cores were placed into  
 4 treatment tanks prior to the start of incubation. Dashed lines represent additional treatment  
 5 pulses (N= $\text{NH}_4^+$ , P= $\text{PO}_4^{3-}$ , Si= $\text{SiO}_3$ ) that occurred during incubation.

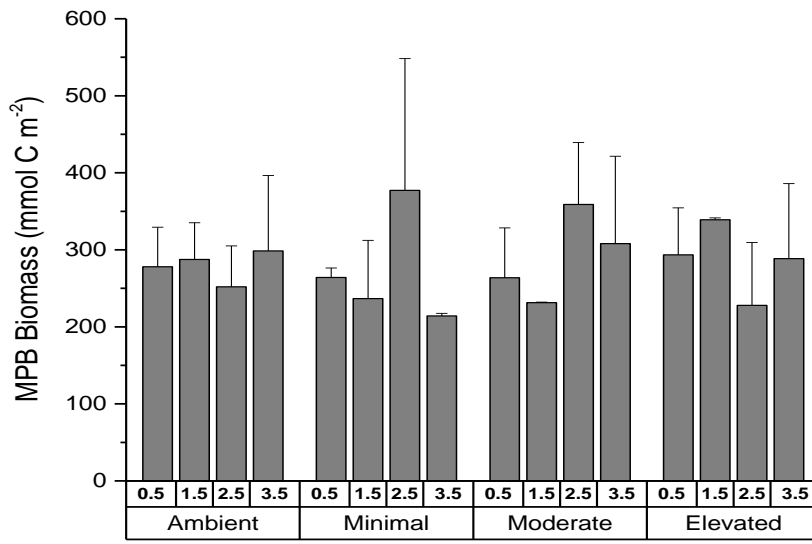

6

7 **Supplemental Figure 2:** MPB carbon biomass in 0 to 2 cm sediments calculated from  
 8 chlorophyll  $\alpha$  concentrations, assuming a C:Chl- $\alpha$  ratio of 40 (mean  $\pm$  SE).

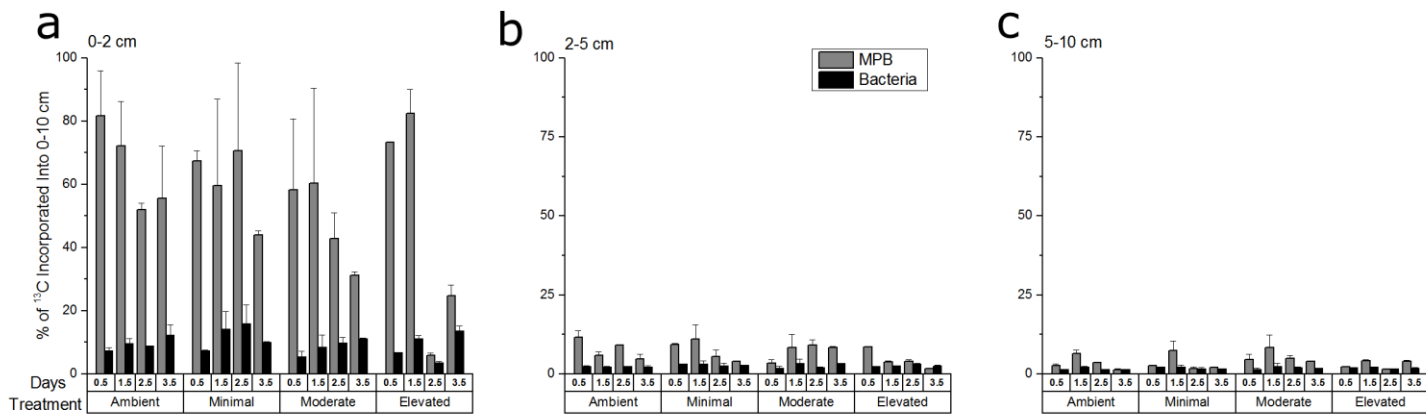

10 **Supplemental Figure 3:** Excess  $^{13}\text{C}$  incorporation into MPB and bacterial biomass at depths  
 11 a) 0-2 cm, b) 2-5 cm and c) 5-10 cm as a portion of the total  $^{13}\text{C}$  in 0-10 cm sediment OC at  
 12 each time.

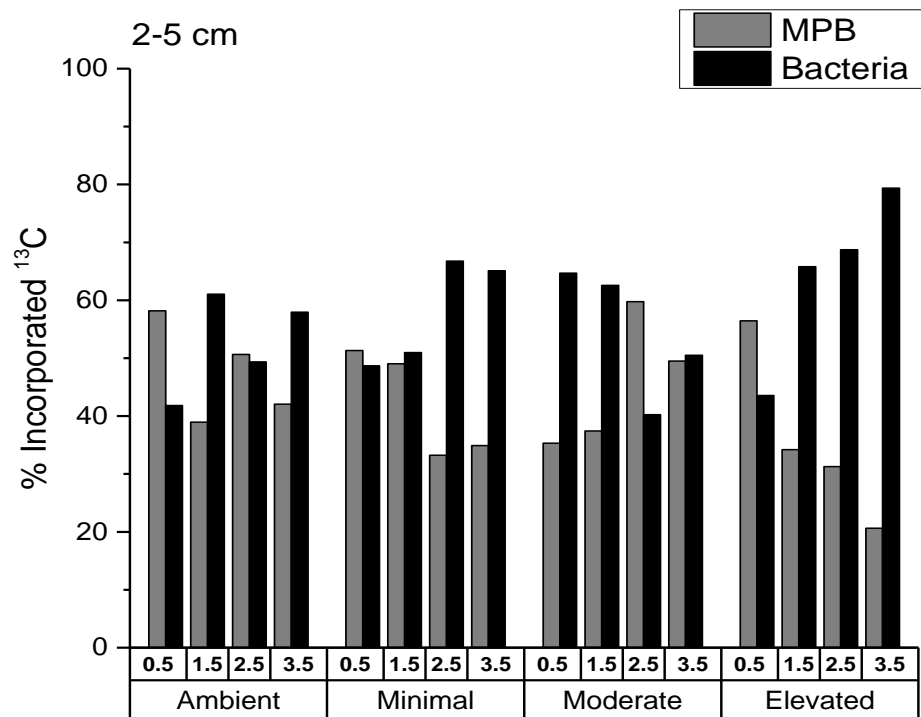

13

14 **Supplemental Figure 4:** Excess  $^{13}\text{C}$  incorporation into MPB and bacterial biomass at a depth  
 15 of 2-5 cm as a percentage of the total  $^{13}\text{C}$  in microbial biomass at 2-5 cm at each time period.

16 There are no error bars as PLFAs were analyzed for only one replicate sample from each time  
 17 period.

18

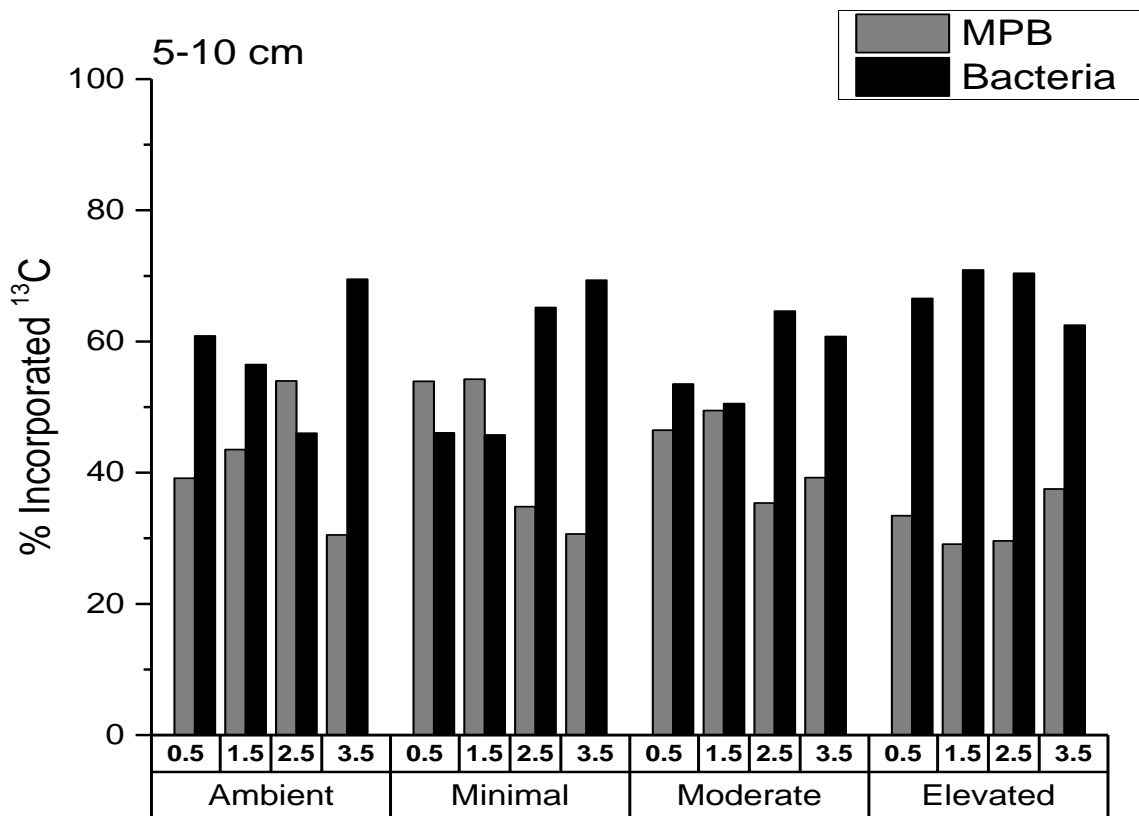

19

20 **Supplemental Figure 5:** Excess  $^{13}\text{C}$  incorporation into MPB and bacterial biomass at a depth  
 21 of 5 -10 cm as a percentage of the total  $^{13}\text{C}$  in microbial biomass at 5-10 cm at each time  
 22 period. There are no error bars as PLFAs were analyzed for only one replicate sample from  
 23 each time period.

24
